# Supplementary material
Source: PubMed Central journal article supplement (PMC2680998)
Supplement: mmc1.pdf [file mmc1.pdf]

## Supplemental Data

### Null Mutations in *LTBP2* Cause

### Primary Congenital Glaucoma

Manir Ali, Martin McKibbin, Adam Booth, David A. Parry, Payal Jain, S. Amer Riazuddin, J. Fielding Hejtmancik, Shaheen N. Khan, Sabika Firasat, Mike Shires, David F. Gilmour, Katherine Towns, Anna-Louise Murphy, Dimitar Azmanov, Ivailo Tournev, Sylvia Cherninkova, Hussain Jafri, Yasmin Raashid, Carmel Toomes, Jamie Craig, David A. Mackey, Luba Kalaydjieva, Sheikh Riazuddin, and Chris F. Inglehearn

#### Figure S1. Homozygosity mapping of PCG in family MEP47 to chromosome 14q24.

DNA from the four affected individuals in family MEP47 were mixed in equimolar amounts then analysed as a single sample on an Affymetrix 50k SNP array. The resultant genotypes were examined by eye to look for large regions of homozygosity. Only one obvious region was observed, on chromosome 14q24 (data not shown). Highly informative microsatellite markers were used to confirm linkage. Pedigree and microsatellite haplotype data are depicted. Note the homozygous region only in the affected members of the family with the critical interval spanning a region of ~6.7Mb between the markers D14S258 and D14S42.

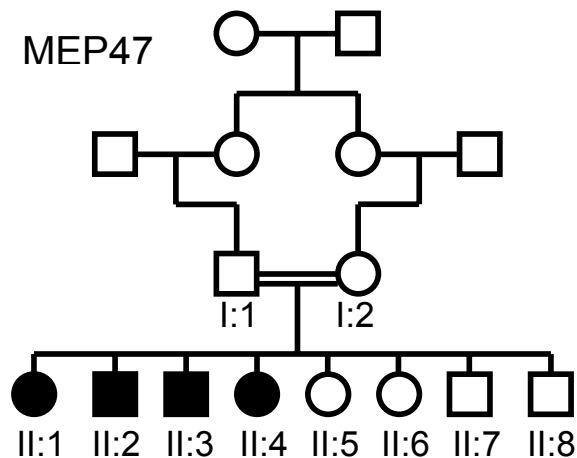

American Journal of Human Genetics, Volume 84

| Marker   | Physical distance (Mb) | DeCODE Genetic distance (cM) | I:1     | II:2    | II:1    | II:2    | II:3    | II:4    | II:5    | II:6    | II:7    | II:8    |
|----------|------------------------|------------------------------|---------|---------|---------|---------|---------|---------|---------|---------|---------|---------|
| D14S1038 | 58.6                   | 60.06                        | 222 224 | 222 224 | 222 224 | 222 224 | 222 224 | 222 224 | 224 222 | 222 222 | 222 224 | 224 222 |
| D14S1065 | 67.86                  | 66.49                        | 250 261 | 250 261 | 250 250 | 261 261 | 250 250 | 250 250 | 261 250 | 261 261 | 261 261 | 261 250 |
| D14S258  | 69.6                   | 68.5                         | 175 171 | 175 169 | 175 175 | 171 175 | 175 175 | 175 175 | 171 175 | 171 169 | 171 169 | 171 175 |
| D14S277  | 72                     | 71.02                        | 149 151 | 149 157 | 149 149 | 149 149 | 149 149 | 149 149 | 151 149 | 151 149 | 151 157 | 151 149 |
| D14S1047 | 73.9                   | 72.94                        | 138 136 | 138 142 | 138 138 | 138 138 | 138 138 | 138 138 | 136 138 | 136 138 | 136 142 | 136 138 |
| D14S61   | 75.4                   | 74.72                        | 212 223 | 212 216 | 212 212 | 212 212 | 212 212 | 212 212 | 223 212 | 223 212 | 223 216 | 223 212 |
| D14S53   | 75.9                   | 75.71                        | 147 141 | 147 147 | 147 147 | 147 147 | 147 147 | 147 147 | 141 147 | 141 147 | 141 147 | 141 147 |
| D14S42   | 76.3                   | 76.18                        | 118 118 | 118 120 | 118 118 | 118 118 | 118 118 | 118 120 | 118 118 | 118 118 | 118 120 | 118 118 |
| D14S983  | 76.5                   | 77.43                        | 265 272 | 265 265 | 265 265 | 265 265 | 265 265 | 265 265 | 272 265 | 272 265 | 272 265 | 272 265 |

**Figure S2. Testing the LTBP2 antibody.**

The rabbit polyclonal antiserum used in this study was raised against a protein fragment containing the amino-terminal third of cow LTBP2 (LifeSpan Biosciences Inc.). (A) In order to obtain a theoretical value of the molecular weight (MW) in kilodaltons (kDa) for cow LTBP2 and its homologues, LTBP1 and fibrillin1, the corresponding full-length protein sequences were analysed using the compute pI/MW tool at ExPASy. (B) Protein extracts from cow eyes were resolved under reducing conditions by SDS PAGE and analysed by western blotting using the LTBP2 antibody, anti-rabbit immunoglobulin conjugated to horse radish peroxidase as secondary followed by chemilluminescence detection. Lanes 1, 2 and 3 represent 30, 15 and 5 micrograms of total protein extract. The band sizes for the protein ladder are shown. Note that the antibody recognised a single immunoreactive species at ~210 kDa, the expected size for LTBP2, but does not recognise any distinct bands at ~312 or ~147 kDa, the calculated sizes for fibrillin1 and LTBP1 respectively.

(A)

|                | Accession No. | Amino acids | MW (kDa) |
|----------------|---------------|-------------|----------|
| Cow LTBP1      | NP_001096561  | 1338        | 147      |
| Cow LTBP2      | NP_776810     | 1963        | 212      |
| Cow Fibrillin1 | NP_776478     | 2871        | 312      |

(B)

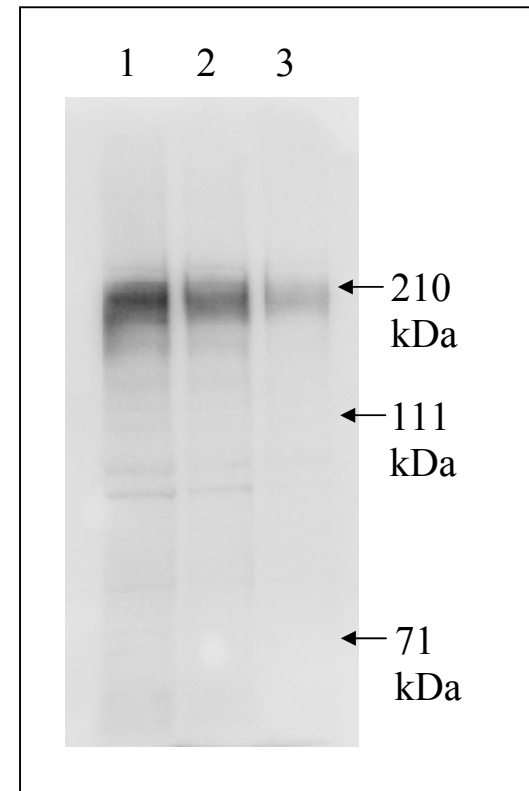

**Table S1. Oligonucleotide primers used in this study.**

(A) Primer pairs used for the amplification of the coding regions and splice site junctions of the human *LTBP2* gene.

(B) Additional primers required to perform the PCR prior to mutation restriction analysis.

(A)

| Exon  | Primer Sequence (F)     | Primer Sequence (R)   | Product Size (bp) |
|-------|-------------------------|-----------------------|-------------------|
| 1A    | GCCGACCACAAAGCTCTTC     | GAGTGCTTCTCCGGTCTG    | 434               |
| 1B    | TGCAGCCAAGGTGTACAGTC    | CCCCTCTGTACCCFCCAAC   | 342               |
| 2     | GATGTGCAGAGAATGGCAGA    | GCGGAGTGTCTGCTACTGGT  | 286               |
| 3     | AGAGTGGCTTCTGTGTTGAG    | CTTCACCAAACGGTCCAAG   | 476               |
| 4     | GCAGCCAGAGACATTTTTC     | AACTCAGCCCCTCTGTGAGA  | 403               |
| 5     | AATGCCCTTGAGATGAATGC    | CTGGCTCTCTGGCCATCTAC  | 349               |
| 6     | GCCTGTTTCTCTGTGGTGGT    | CAGCTTCCCTATCCCTGTCA  | 386               |
| 7     | TGGTGGATACCCTTCAGAGG    | GAGGAGGAGAAGGGCAGACT  | 441               |
| 8     | AATGTGGGGAGTGAGCTCTG    | AAGGCAGGTCTGGGAAGTCT  | 351               |
| 9     | AGGTGGCTGAGAGGAGTCT     | TAGTCCCCTGGAATCAGCAG  | 415               |
| 10    | CGGGCACTTGGTCACTCCT     | GTGATCAGGTCTGGGAAAA   | 262               |
| 11    | GCTCCAAACTTCCCAACTGA    | GGTTGGGATAAGCACGTGAG  | 444               |
| 12    | TCACGTGCTTATCCCAACCT    | AGGGACCCAGGATTAACACC  | 447               |
| 13    | CAGAGGAGCCAAAAGTGACC    | TCCTTCTCACCCCTCCTCTGA | 206               |
| 14    | GTCTGAGCACCAGGGAAGAG    | GAGGGACCCTGTGTTCTTTG  | 370               |
| 15    | CACCCTGCCATAACCTCTGT    | TGCTTGGACCTTCTGCTTCT  | 271               |
| 16    | GGCTGACTTTATGGCTTCCA    | CAGGCTGGAGTCTGGTCTC   | 457               |
| 17    | ATCCTTTGTCTTGGCCTCT     | GAATGTCACTGAGGGGATGG  | 406               |
| 18    | AGGACAAGGATTTGCTGTG     | ACCTCTTCCCTTCCGTGT    | 287               |
| 19    | CCCTGGCCTCATAACTGAGA    | GGATGTGTTGGGTCAGTGTG  | 350               |
| 20    | CTGCAGAGTCCACACAGAA     | TATTCTGTCCCCTTCCACCA  | 202               |
| 21    | TCCCCAAGTTCAGAGTGAGG    | AGCTTGTGAGCGACTCTTGG  | 466               |
| 22_23 | GGAGACTTCCCCCTTGACTC    | GCTGGCTTCCCATGCTCCTG  | 475               |
| 24    | GCCCAGAGGAAGCTACACAG    | GAGCTAAGGACCAGGCAGTG  | 273               |
| 25    | GGAAATCGTCTGACCTTGA     | TGAAAAGCAGCCTCTCAACC  | 492               |
| 26    | GTGCATGCGTGTGAGAGAGT    | CAGGACCAGTTGAGGAGGAG  | 298               |
| 27    | AAGGCCTAGCCTGCTTCTTT    | CCTGTAGCTCCTGGTTTTGC  | 447               |
| 28_29 | CCTTAGAGGGTCATGAACAGACA | CCCCTCAGGTGAAGGAGTT   | 489               |
| 30    | CCCTCACTGCCTCTCACC      | TCCTGGGGACAACTCTGAC   | 356               |
| 31_32 | TGATAGGCAACACCCTTCC     | CCTGCAGGTATCCCCTTTG   | 499               |
| 33    | CAGAGGGTACCAGTCTTTC     | CTAGCAGGTGGAGGAGATGG  | 455               |

(B)

| Primer | Sequence                         |
|--------|----------------------------------|
| 1BIIR  | GGTCTGCGCAGGTGGCTGGACACGCAGCGACT |
| 4IIF   | CCCAGCAGCACGTGGGGTTGTCCCAGTGTGTC |
| 6IIR   | CAGCTTCCCTATCCCTGTCA             |

**American Journal of Human Genetics, Volume 84**

|    |                      |                      |     |
|----|----------------------|----------------------|-----|
| 34 | AGTCTGGACACAGCCCTCAG | TCTTCCAGCCTTCCTGAGTT | 279 |
| 35 | CTTGGGCATGGTATGAGCTT | AACCTCTGGCCTGATGTCAC | 450 |

**Table S2. The origin of the Pakistani families.**

The families, which belong to different clans, were enrolled from different cities in the Punjab province of Pakistan.

| <b>FAMILY ID</b> | <b>CLAN</b> | <b>CITY</b>  | <b>PROVINCE</b> |
|------------------|-------------|--------------|-----------------|
| MEP47            | Khokhar     | Khushab      | Punjab          |
| PKGL005          | Jatt        | Muzaffargarh |                 |
| PKGL010          | Macchi      | Gujranwala   |                 |
| PKGL025          | Lohar       | Mianwali     |                 |

**Table S3. Additional features in the PCG families.**

The individuals ID (from Figure 2C) and their age at the time of the investigation are shown. Bone mineral density was measured using a DEXA scan. A T-score between -1.00 and -2.50 indicates osteopenia whereas a score of less than -2.50 indicates osteoporosis. In echocardiography, the normal range for aortic valve measurements (AV area) is between 3.0 and 4.0 cm<sup>2</sup>. A clinical assessment for Marfan syndrome was also performed on the patients.

|                | Individuals ID | Gender | Age at time of study (years) | DEXA scan (T-score) |            | Echocardiogram              | Clinical examination      | Additional comment |
|----------------|----------------|--------|------------------------------|---------------------|------------|-----------------------------|---------------------------|--------------------|
|                |                |        |                              | Spine               | Femur neck |                             |                           |                    |
| <b>PKGL005</b> |                |        |                              |                     |            |                             |                           |                    |
| PCG affected   | 31             | F      | 23                           | -2.41               | -2.80      | Normal                      | Not suggestive of Marfans | High arched palate |
| Normal         | 24             | M      | 23                           | -1.49               | -0.34      | -                           | -                         | -                  |
| <b>PKGL010</b> |                |        |                              |                     |            |                             |                           |                    |
| PCG affected   | 10             | M      | 18                           | -1.15               | -2.69      | AV area: 1.8cm <sup>2</sup> | Not suggestive of Marfans | High arched palate |
| Carrier        | 12             | M      | 13                           | -2.12               | -2.37      | AV area: 2.5cm <sup>2</sup> | -                         | -                  |
| <b>PKGL025</b> |                |        |                              |                     |            |                             |                           |                    |
| PCG affected   | 24             | F      | 18                           | -1.30               | -1.44      | Normal                      | Not suggestive of Marfans | -                  |
| Carrier        | 22             | M      | 6                            | -3.56               | -3.16      | -                           | -                         | -                  |
